# Supplementary material for: Secular Trends of Breast Cancer in China, South Korea, Japan and the United States: Application of the Age-Period-Cohort Analysis
Source: PubMed Central journal article supplement (PMC4690929; doi:10.3390/ijerph121214993), 2015-12-04
Supplement: ijerph-12-14993-s001.pdf [file ijerph-12-14993-s001.pdf]

## Secular Trends of Breast Cancer in China, South Korea, Japan and the United States: Application of the Age-Period-Cohort Analysis

**Table S1.** Age-specific mortality rate for breast cancer by year of death in urban China (10,000).

| Age   | Year of Death |           |           |           |           |
|-------|---------------|-----------|-----------|-----------|-----------|
|       | 1988–1992     | 1993–1997 | 1998–2002 | 2003–2007 | 2008–2012 |
| 20–24 | 0.12          | 0.10      | 0.06      | 0.04      | 0.10      |
| 25–29 | 0.53          | 0.40      | 0.36      | 0.50      | 0.33      |
| 30–34 | 2.14          | 1.74      | 1.21      | 1.44      | 1.43      |
| 35–39 | 4.94          | 4.84      | 3.39      | 3.93      | 3.45      |
| 40–44 | 8.04          | 9.96      | 8.50      | 7.35      | 6.73      |
| 45–49 | 10.79         | 12.58     | 12.88     | 13.19     | 10.96     |
| 50–54 | 15.20         | 14.35     | 16.70     | 18.49     | 16.35     |
| 55–59 | 17.33         | 18.07     | 20.78     | 19.92     | 21.01     |
| 60–64 | 19.30         | 20.18     | 22.68     | 18.48     | 21.85     |
| 65–69 | 22.79         | 23.07     | 22.80     | 22.02     | 22.07     |
| 70–74 | 29.28         | 27.46     | 25.57     | 23.78     | 26.64     |
| 75–79 | 36.26         | 34.34     | 30.92     | 27.07     | 31.32     |

**Table S2.** Age-specific mortality rate for breast cancer by year of death in rural China (10,000).

| Age   | Year of Death |           |           |           |           |
|-------|---------------|-----------|-----------|-----------|-----------|
|       | 1988–1992     | 1993–1997 | 1998–2002 | 2003–2007 | 2008–2012 |
| 20–24 | 0.09          | 0.12      | 0.09      | 0.05      | 0.11      |
| 25–29 | 0.44          | 0.53      | 0.67      | 0.52      | 0.54      |
| 30–34 | 1.38          | 1.63      | 2.09      | 1.52      | 1.16      |
| 35–39 | 2.72          | 3.22      | 3.27      | 3.56      | 3.12      |
| 40–44 | 4.69          | 6.12      | 5.82      | 6.50      | 7.14      |
| 45–49 | 6.68          | 8.37      | 10.03     | 8.80      | 10.10     |
| 50–54 | 8.03          | 9.57      | 12.03     | 13.07     | 14.60     |
| 55–59 | 9.64          | 10.73     | 12.19     | 15.02     | 18.34     |
| 60–64 | 10.16         | 11.02     | 13.66     | 13.99     | 15.98     |
| 65–69 | 10.38         | 10.94     | 14.85     | 12.46     | 14.67     |
| 70–74 | 13.38         | 12.89     | 13.67     | 11.20     | 13.78     |
| 75–79 | 14.48         | 13.43     | 15.74     | 17.77     | 15.02     |

**Table S3.** Age-specific mortality rate for breast cancer by year of death in South Korea (10,000).

| Age   | Year of Death |           |           |           |           |
|-------|---------------|-----------|-----------|-----------|-----------|
|       | 1988–1992     | 1993–1997 | 1998–2002 | 2003–2007 | 2008–2012 |
| 20–24 | 0.10          | 0.20      | 0.11      | 0.12      | 0.04      |
| 25–29 | 0.70          | 0.88      | 0.81      | 0.49      | 0.59      |
| 30–34 | 2.11          | 2.73      | 2.58      | 2.92      | 2.25      |
| 35–39 | 3.42          | 4.75      | 5.07      | 5.36      | 5.48      |
| 40–44 | 5.86          | 6.95      | 7.50      | 8.82      | 8.63      |
| 45–49 | 9.45          | 9.62      | 10.87     | 12.52     | 12.86     |
| 50–54 | 9.70          | 12.07     | 13.13     | 14.45     | 16.73     |
| 55–59 | 8.53          | 11.80     | 14.81     | 16.38     | 17.15     |
| 60–64 | 7.43          | 10.58     | 12.46     | 16.83     | 16.81     |
| 65–69 | 6.59          | 9.65      | 9.58      | 13.32     | 16.13     |
| 70–74 | 6.28          | 10.31     | 10.95     | 12.83     | 15.09     |
| 75–79 | 6.18          | 11.30     | 12.98     | 13.73     | 15.96     |

**Table S4.** Age-specific mortality rate for breast cancer by year of death in Japan (10,000).

| Age   | Year of Death |           |           |           |           |           |           |           |           |           |           |           |
|-------|---------------|-----------|-----------|-----------|-----------|-----------|-----------|-----------|-----------|-----------|-----------|-----------|
|       | 1953–1957     | 1958–1962 | 1963–1967 | 1968–1972 | 1973–1977 | 1978–1982 | 1983–1987 | 1988–1992 | 1993–1997 | 1998–2002 | 2003–2007 | 2008–2012 |
| 20–24 | 0.04          | 0.07      | 0.06      | 0.08      | 0.12      | 0.07      | 0.14      | 0.06      | 0.10      | 0.07      | 0.09      | 0.05      |
| 25–29 | 0.46          | 0.44      | 0.46      | 0.47      | 0.61      | 0.83      | 0.73      | 0.66      | 0.51      | 0.55      | 0.52      | 0.47      |
| 30–34 | 1.73          | 1.68      | 1.75      | 2.12      | 2.42      | 2.63      | 2.77      | 2.79      | 2.51      | 2.70      | 2.26      | 1.91      |
| 35–39 | 3.97          | 3.93      | 4.07      | 4.31      | 4.70      | 5.05      | 5.56      | 6.51      | 6.82      | 6.64      | 5.78      | 4.97      |
| 40–44 | 6.91          | 6.65      | 7.05      | 7.14      | 8.24      | 8.56      | 9.25      | 10.94     | 12.16     | 12.09     | 11.47     | 10.67     |
| 45–49 | 8.53          | 9.62      | 9.82      | 10.85     | 12.36     | 12.92     | 13.90     | 15.24     | 18.55     | 20.39     | 19.50     | 17.92     |
| 50–54 | 10.30         | 10.91     | 12.11     | 13.56     | 16.11     | 17.24     | 17.98     | 20.43     | 24.21     | 27.94     | 29.41     | 27.24     |
| 55–59 | 11.84         | 11.56     | 12.46     | 14.20     | 16.37     | 19.99     | 20.69     | 22.85     | 25.88     | 29.55     | 34.24     | 36.11     |
| 60–64 | 12.51         | 11.50     | 11.77     | 13.65     | 15.87     | 18.40     | 20.65     | 21.57     | 24.55     | 28.24     | 31.69     | 36.16     |
| 65–69 | 13.40         | 12.46     | 12.01     | 12.86     | 15.47     | 17.94     | 18.60     | 20.43     | 24.15     | 26.29     | 29.70     | 33.75     |
| 70–74 | 15.32         | 14.71     | 13.30     | 13.49     | 14.61     | 17.34     | 18.19     | 20.34     | 22.58     | 25.61     | 27.95     | 32.52     |
| 75–79 | 17.49         | 15.93     | 15.08     | 16.05     | 16.81     | 17.18     | 18.09     | 19.84     | 23.51     | 26.45     | 29.68     | 33.11     |

**Table S5.** Age-specific mortality rate for breast cancer by year of death in US (10,000).

| Age   | Year of Death |           |           |           |           |           |           |           |           |           |           |           |
|-------|---------------|-----------|-----------|-----------|-----------|-----------|-----------|-----------|-----------|-----------|-----------|-----------|
|       | 1953–1957     | 1958–1962 | 1963–1967 | 1968–1972 | 1973–1977 | 1978–1982 | 1983–1987 | 1988–1992 | 1993–1997 | 1998–2002 | 2003–2007 | 2008–2012 |
| 20–24 | 0.24          | 0.21      | 0.28      | 0.20      | 0.21      | 0.15      | 0.15      | 0.10      | 0.14      | 0.08      | 0.12      | 0.08      |
| 25–29 | 1.61          | 1.53      | 1.65      | 1.80      | 1.48      | 1.28      | 1.22      | 1.19      | 1.01      | 0.83      | 0.69      | 0.66      |
| 30–34 | 5.86          | 6.03      | 5.86      | 5.72      | 5.58      | 5.38      | 5.10      | 4.59      | 3.94      | 3.64      | 3.04      | 2.60      |
| 35–39 | 13.78         | 13.72     | 13.59     | 12.88     | 12.54     | 12.29     | 12.90     | 11.76     | 10.07     | 8.60      | 7.65      | 6.68      |
| 40–44 | 26.87         | 25.97     | 26.08     | 26.25     | 23.74     | 23.05     | 23.02     | 22.52     | 19.41     | 16.14     | 14.21     | 13.25     |
| 45–49 | 44.18         | 41.51     | 42.72     | 43.61     | 42.07     | 37.79     | 36.61     | 36.45     | 32.86     | 26.25     | 22.97     | 20.86     |
| 50–54 | 53.79         | 54.60     | 59.95     | 60.22     | 59.66     | 57.31     | 54.16     | 52.55     | 48.16     | 40.11     | 34.20     | 31.14     |
| 55–59 | 61.94         | 63.71     | 66.08     | 72.47     | 74.16     | 73.34     | 72.56     | 68.88     | 60.97     | 53.00     | 47.80     | 41.38     |
| 60–64 | 69.97         | 70.51     | 78.73     | 78.62     | 84.02     | 84.47     | 89.69     | 85.43     | 74.91     | 65.08     | 61.14     | 55.01     |
| 65–69 | 80.71         | 81.83     | 83.08     | 89.28     | 91.18     | 94.76     | 99.99     | 100.86    | 91.38     | 78.02     | 71.38     | 68.99     |
| 70–74 | 98.61         | 95.60     | 94.16     | 98.01     | 108.44    | 104.97    | 113.75    | 117.26    | 110.47    | 96.92     | 85.78     | 80.55     |
| 75–79 | 123.01        | 109.04    | 107.49    | 111.65    | 113.78    | 117.75    | 123.04    | 132.51    | 129.60    | 116.16    | 107.46    | 98.29     |

**Table S6.** Summary statistics comparing goodness-of-fit for different models.

|               |     | Age Only | Age + Period | Age + Cohort | APC (IE) |
|---------------|-----|----------|--------------|--------------|----------|
| urban China   | AIC | 839.6    | 341.9        | 427.4        | 5.0      |
|               | BIC | 920.1    | 396.7        | 459.9        | -131.3   |
| rural China   | AIC | 746.4    | 305.4        | 395.1        | 4.6      |
|               | BIC | 819.3    | 339.3        | 458.0        | -126.7   |
| South Korea   | AIC | 1025.3   | 524.1        | 496.6        | 4.6      |
|               | BIC | 1134.2   | 576.8        | 603.4        | -122.1   |
| Japan         | AIC | 868.0    | 432.7        | 1162.6       | 5.0      |
|               | BIC | 986.3    | 484.5        | 1616.7       | -122.6   |
| United States | AIC | 960.2    | 375.8        | 456.9        | 5.7      |
|               | BIC | 1176.3   | 408.0        | 482.4        | -122.7   |

**Table S7.** APC model analysis results of breast cancer mortality.

|                      | Urban China |      | Rural China |      | South Korea |      | Japan |      | US    |      |
|----------------------|-------------|------|-------------|------|-------------|------|-------|------|-------|------|
|                      | Coef.       | SE   | Coef.       | SE   | Coef.       | SE   | Coef. | SE   | Coef. | SE   |
| <b>Age (year)</b>    |             |      |             |      |             |      |       |      |       |      |
| 20–24                | -3.48       | 1.50 | -3.17       | 1.44 | -2.87       | 1.18 | -3.60 | 2.95 | -4.24 | 1.75 |
| 25–29                | -1.96       | 0.66 | -1.54       | 0.60 | -1.42       | 0.52 | -1.90 | 1.17 | -2.29 | 0.65 |
| 30–34                | -0.88       | 0.44 | -0.67       | 0.43 | -0.35       | 0.35 | -0.64 | 0.77 | -1.03 | 0.42 |
| 35–39                | -0.11       | 0.35 | -0.16       | 0.35 | 0.10        | 0.29 | 0.03  | 0.62 | -0.27 | 0.33 |
| 40–44                | 0.40        | 0.29 | 0.34        | 0.29 | 0.42        | 0.25 | 0.44  | 0.52 | 0.24  | 0.28 |
| 45–49                | 0.66        | 0.24 | 0.64        | 0.25 | 0.68        | 0.22 | 0.74  | 0.44 | 0.61  | 0.23 |
| 50–54                | 0.83        | 0.20 | 0.84        | 0.21 | 0.77        | 0.19 | 0.95  | 0.36 | 0.88  | 0.20 |
| 55–59                | 0.92        | 0.17 | 0.91        | 0.18 | 0.74        | 0.17 | 0.99  | 0.30 | 1.04  | 0.18 |
| 60–64                | 0.90        | 0.15 | 0.83        | 0.17 | 0.61        | 0.16 | 0.88  | 0.27 | 1.14  | 0.17 |
| 65–69                | 0.89        | 0.15 | 0.73        | 0.16 | 0.41        | 0.16 | 0.78  | 0.26 | 1.21  | 0.17 |
| 70–74                | 0.91        | 0.17 | 0.62        | 0.17 | 0.41        | 0.17 | 0.68  | 0.29 | 1.31  | 0.18 |
| 75–79                | 0.94        | 0.21 | 0.63        | 0.20 | 0.49        | 0.20 | 0.65  | 0.35 | 1.39  | 0.20 |
| <b>Period (year)</b> |             |      |             |      |             |      |       |      |       |      |
| 1990                 | -0.25       | 0.13 | -0.40       | 0.14 | -0.49       | 0.13 | -0.38 | 0.23 | 0.06  | 0.08 |
| 1995                 | -0.10       | 0.09 | -0.20       | 0.11 | -0.16       | 0.10 | -0.17 | 0.16 | 0.06  | 0.08 |
| 2000                 | 0.03        | 0.07 | 0.07        | 0.09 | 0.00        | 0.09 | 0.02  | 0.13 | 0.02  | 0.11 |
| 2005                 | 0.09        | 0.09 | 0.17        | 0.10 | 0.24        | 0.10 | 0.18  | 0.15 | 0.03  | 0.14 |
| 2010                 | 0.23        | 0.12 | 0.36        | 0.12 | 0.41        | 0.11 | 0.35  | 0.21 | 0.07  | 0.17 |
| <b>Cohort (year)</b> |             |      |             |      |             |      |       |      |       |      |
| 1915–1919            | 1.10        | 0.32 | 0.97        | 0.36 | 0.37        | 0.48 | 0.77  | 0.73 | 0.65  | 0.35 |
| 1920–1924            | 0.91        | 0.27 | 0.79        | 0.29 | 0.57        | 0.37 | 0.75  | 0.63 | 0.61  | 0.35 |
| 1925–1929            | 0.68        | 0.23 | 0.59        | 0.25 | 0.60        | 0.34 | 0.67  | 0.58 | 0.56  | 0.35 |
| 1930–1934            | 0.51        | 0.22 | 0.48        | 0.23 | 0.49        | 0.33 | 0.62  | 0.56 | 0.46  | 0.36 |
| 1935–1939            | 0.41        | 0.21 | 0.28        | 0.22 | 0.43        | 0.32 | 0.54  | 0.56 | 0.33  | 0.37 |
| 1940–1944            | 0.34        | 0.23 | 0.18        | 0.24 | 0.47        | 0.33 | 0.49  | 0.58 | 0.22  | 0.40 |
| 1945–1949            | 0.18        | 0.26 | 0.13        | 0.26 | 0.51        | 0.34 | 0.44  | 0.62 | 0.14  | 0.42 |
| 1950–1954            | 0.16        | 0.29 | 0.14        | 0.29 | 0.35        | 0.36 | 0.41  | 0.67 | 0.01  | 0.45 |
| 1955–1959            | 0.14        | 0.33 | 0.14        | 0.33 | 0.23        | 0.39 | 0.30  | 0.73 | -0.16 | 0.49 |
| 1960–1964            | -0.03       | 0.38 | -0.05       | 0.37 | 0.17        | 0.41 | 0.08  | 0.79 | -0.29 | 0.53 |

Table S7. Cont.

| Cohort (year) | Urban China |      | Rural China |      | South Korea |      | Japan |      | US    |      |
|---------------|-------------|------|-------------|------|-------------|------|-------|------|-------|------|
|               | Coef.       | SE   | Coef.       | SE   | Coef.       | SE   | Coef. | SE   | Coef. | SE   |
| 1965–1969     | −0.32       | 0.43 | −0.16       | 0.41 | 0.05        | 0.44 | −0.14 | 0.87 | −0.42 | 0.58 |
| 1970–1974     | −0.52       | 0.49 | −0.21       | 0.46 | −0.12       | 0.48 | −0.38 | 0.96 | −0.52 | 0.65 |
| 1975–1979     | −0.69       | 0.59 | −0.52       | 0.56 | −0.25       | 0.53 | −0.70 | 1.11 | −0.69 | 0.78 |
| 1980–1984     | −0.77       | 0.76 | −0.93       | 0.77 | −0.75       | 0.69 | −0.98 | 1.43 | −0.89 | 1.10 |
| 1985–1989     | −1.24       | 1.45 | −0.97       | 1.18 | −0.97       | 1.10 | −1.12 | 2.40 | −0.95 | 1.96 |
| 1990–1994     | −0.86       | 3.29 | −0.87       | 3.14 | −2.15       | 4.68 | −1.73 | 8.81 | −1.11 | 6.63 |

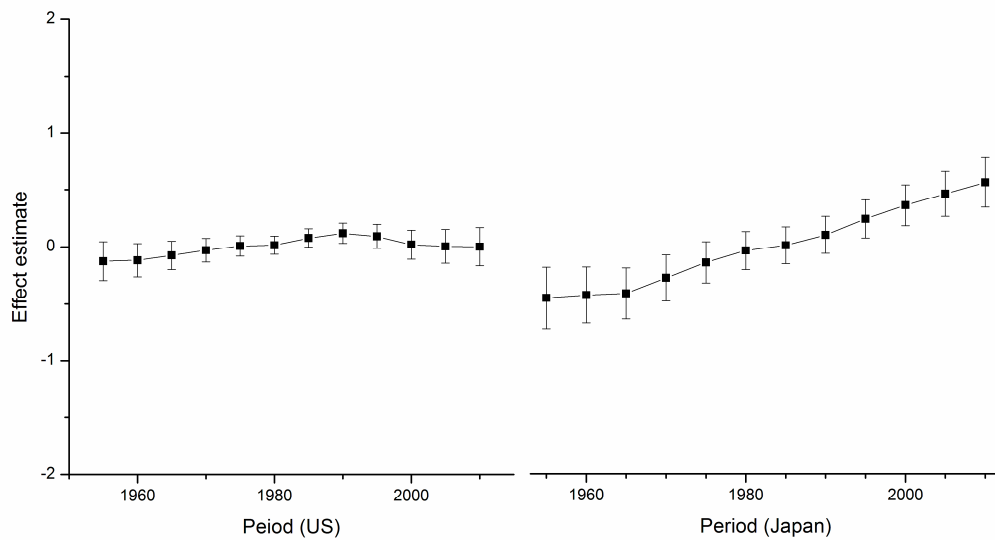

**Figure S1.** Period effect on breast cancer mortality from the results of APC-IE analysis in the US and Japan (bars around the point estimate indicate the 95% confidence intervals).

© 2015 by the authors; licensee MDPI, Basel, Switzerland. This article is an open access article distributed under the terms and conditions of the Creative Commons Attribution license (<http://creativecommons.org/licenses/by/4.0/>).
